# Supplementary material for: Diversity and Biomineralization Potential of the Epilithic Bacterial Communities Inhabiting the Oldest Public Stone Monument of Cluj-Napoca (Transylvania, Romania)
Source: PubMed Central journal article supplement (PMC5339310; doi:10.3389/fmicb.2017.00372), 2017-03-07
Supplement: Data_Sheet_1.pdf [file Data_Sheet_1.pdf]

## *Supplementary Material*

### **Diversity and Biomineralization Potential of the Epilithic Bacterial Communities Inhabiting the Oldest Public Stone Monument of Cluj-Napoca (Transylvania, Romania)**

**Adrian-Ștefan Andrei<sup>1,2,~</sup>, Manuela Raluca Păușan<sup>1,3,~</sup>, Tudor Tămaș<sup>4</sup>, Nicolae Har<sup>4</sup>, Lucian Barbu-Tudoran<sup>1,5</sup>, Nicolae Leopold<sup>6</sup> and Horia Leonard Banciu<sup>1,7\*</sup>**

<sup>1</sup>Department of Molecular Biology and Biotechnology, Babeș-Bolyai University, Cluj-Napoca, Romania

<sup>2</sup>Institute of Hydrobiology, Department of Aquatic Microbial Ecology, Biology Center of the Academy of Sciences of the Czech Republic, České Budějovice, Czech Republic

<sup>3</sup>Department for Internal Medicine, Medical University of Graz, Graz, Austria

<sup>4</sup>Department of Geology, Babeș-Bolyai University, Cluj-Napoca, Romania

<sup>5</sup>Electron Microscopy Center, Babeș-Bolyai University, Cluj-Napoca, Romania

<sup>6</sup>Faculty of Physics, Babeș-Bolyai University, Cluj-Napoca, Romania

<sup>7</sup>Center for Systems Biology, Biodiversity, and Bioresources, Babes-Bolyai University, Cluj-Napoca, Romania.

<sup>~</sup>These authors have equal contribution to this work.

\* **Correspondence:** Horia Leonard Banciu, Faculty of Biology and Geology, Babes-Bolyai University, 5-7 Clinicilor Str., 400006 Cluj-Napoca, Romania. Tel.: +40-264-431691; fax: +40-264-431858; e-mail: Horia.Banciu@ubbcluj.ro

## Supplementary tables

**Supplementary Table S1.** Primers used in PCR amplification.

| <b>Primer name</b> | <b>Target Group</b> | <b>Primer sequence (5' to 3')</b> | <b>Reference</b>      |
|--------------------|---------------------|-----------------------------------|-----------------------|
| <b>1492R</b>       | Universal           | GGTACCTTGTTACGACTT                | (Lane, 1991)          |
| <b>27F</b>         | Bacteria            | AGAGTTTGATCCTGGCTCAG              | (Lane, 1991)          |
| <b>338F</b>        | Bacteria            | ACTCCTACGGGAGGCAGCAG              | (Lane, 1991)          |
| <b>518R</b>        | Bacteria            | ATTACCGCGGCTGCTGG                 | (Muyzer et al., 1993) |
| <b>341-GC</b>      | Bacteria            | ACGGGGGGCCTACGGGAGGCAGCAG         | (Muyzer et al., 1993) |

## Bacterial Communities Inhabiting Limestone Monuments

**Supplementary Table S2.** The number of distinct PCR-DGGE bands and the Margalef index for the analysed microbial communities. The samples names reflect their location on Saint Donatus statue.

| <b>Samples</b> | <b>Number of bands</b> | <b>Margalef species richness</b> |
|----------------|------------------------|----------------------------------|
| North          | 28                     | 3.989                            |
| South          | 31                     | 4.539                            |
| East           | 20                     | 2.973                            |
| West           | 31                     | 4.317                            |
| Upper          | 34                     | 4.813                            |
| Lower          | 32                     | 4.488                            |

## Bacterial Communities Inhabiting Limestone Monuments

**Supplementary Table S3.** 16S rRNA gene-based taxonomy of the bacterial strains isolated from the Saint Donatus statue and their Gram coloration. The table contains the closest GenBank sequence match, together with its accession number and sequence identity.

| Sample       | BLASTN-based taxonomy                           | Identity | Gram staining |
|--------------|-------------------------------------------------|----------|---------------|
| North_I_1A   | <i>Stenotrophomonas rhizophila</i> (KR055001.1) | 99%      | Negative      |
| North_I_2A   | <i>Pseudomonas synxantha</i> (KC834326.1)       | 100%     | Negative      |
| North_I_4A   | <i>Pseudomonas synxantha</i> (KC834326.1)       | 100%     | Negative      |
| North_II_1A  | <i>Pseudomonas grimontii</i> (KR054989.1)       | 100%     | Negative      |
| North_II_2A  | <i>Pseudomonas synxantha</i> (NR_113583.1)      | 100%     | Negative      |
| North_II_3A  | <i>Stenotrophomonas rhizophila</i> (KR055001.1) | 100%     | Negative      |
| North_II_4A  | <i>Pseudomonas synxantha</i> (KC834326.1)       | 99%      | Negative      |
| North_I_3B   | <i>Klebsiella sp.</i> OS-B4 (FN178363.1)        | 99%      | Negative      |
| North_I_4B*  | <i>Pseudomonas fluorescens</i> (KU291443.1)     | 99%      | Negative      |
| North_I_5B*  | <i>Bacillus pumilus</i> (KJ476724.1)            | 99%      | Positive      |
| North_II_1B  | <i>Klebsiella sp.</i> OS-B4 (FN178363.1)        | 99%      | Negative      |
| North_II_2B  | <i>Pseudomonas lurida</i> (KM891560.1)          | 99%      | Negative      |
| North_II_4B  | <i>Pseudomonas sp.</i> SGb394 (HQ224639.1)      | 99%      | Negative      |
| South_I_1A   | <i>Exiguobacterium undae</i> (FN870071.1)       | 99%      | Positive      |
| South_I_2A   | <i>Arthrobacter luteolus</i> (DQ486130.1)       | 100%     | Positive      |
| South_I_3A   | <i>Arthrobacter luteolus</i> (DQ486130.1)       | 99%      | Positive      |
| South_I_4A   | <i>Exiguobacterium undae</i> (AB669472.1)       | 99%      | Positive      |
| South_I_5A*  | <i>Bacillus pumilus</i> (KJ476724.1)            | 99%      | Positive      |
| South_II_2A  | <i>Pantoea agglomerans</i> (AF130947.2)         | 99%      | Negative      |
| South_II_3A  | <i>Exiguobacterium undae</i> (AB669472.1)       | 99%      | Positive      |
| South_II_4A  | <i>Pantoea agglomerans</i> (KR265469.1)         | 99%      | Negative      |
| South_II_5A* | <i>Bacillus pumilus</i> (KJ476724.1)            | 100%     | Positive      |
| South_I_1B   | <i>Pseudomonas putida</i> (KF640247.1)          | 98%      | Negative      |
| South_I_4B*  | <i>Pseudomonas putida</i> (KF640247.1)          | 99%      | Negative      |
| South_I_5B*  | <i>Brevibacterium iodinium</i> (KM259941.1)     | 99%      | Positive      |

### Bacterial Communities Inhabiting Limestone Monuments

|             |                                                    |      |          |
|-------------|----------------------------------------------------|------|----------|
| East_I_1A   | <i>Sanguibacter keddieii</i> (KF911337.1)          | 100% | Positive |
| East_I_2A   | <i>Stenotrophomonas rhizophila</i> (KR055001.1)    | 100% | Negative |
| East_I_4A   | <i>Stenotrophomonas rhizophila</i> (KR055001.1)    | 100% | Negative |
| East_II_2A  | <i>Stenotrophomonas rhizophila</i> (KR055001.1)    | 99%  | Negative |
| East II 4 A | <i>Stenotrophomonas rhizophila</i> (KR055001.1)    | 100% | Negative |
| East_I_3B   | <i>Stenotrophomonas rhizophila</i> (KR055001.1)    | 99%  | Negative |
| East_I_5B*  | <i>Bacillus pumilus</i> (KJ476724.1)               | 99%  | Positive |
| East_II_1B  | <i>Stenotrophomonas rhizophila</i> (KR055001.1)    | 95%  | Negative |
| East_II_2B  | <i>Stenotrophomonas rhizophila</i> (KR055001.1)    | 99%  | Negative |
| East_II_3B* | <i>Bacillus safensis</i> (KJ672329.1)              | 99%  | Positive |
| East_II_4B* | <i>Bacillus pumilus</i> (KJ476724.1)               | 99%  | Positive |
| East_II_5B* | <i>Bacillus licheniformis</i> (KU363978.1)         | 99%  | Positive |
| West_I_1B   | <i>Serratia marcescens</i> (KC790279.2)            | 100% | Negative |
| West_I_2B   | <i>Serratia marcescens</i> (KC790279.2)            | 100% | Negative |
| West_I_3B   | <i>Serratia marcescens</i> (KC790279.2)            | 99%  | Negative |
| West_I_4B   | <i>Serratia marcescens</i> (KC790279.2)            | 100% | Negative |
| West_II_1B  | <i>Serratia marcescens</i> (KC790279.2)            | 100% | Negative |
| West_II_2B  | <i>Serratia marcescens</i> (KC790279.2)            | 100% | Negative |
| West_II_3B  | <i>Serratia sp. M401</i> (KJ944090.1)              | 100% | Negative |
| West_II_4B  | <i>Serratia marcescens</i> (KC790279.2)            | 100% | Negative |
| West_II_5B* | <i>Streptomyces albidoflavus</i> (KT758342.1)      | 100% | Positive |
| AWest_II_1  | <i>Pantoea sp. CH-N10</i> (HQ396801.1)             | 99%  | Negative |
| AWest_II_2  | <i>Pantoea sp. CH-N10</i> (HQ396801.1)             | 99%  | Negative |
| AWest_I_2B* | <i>Bacillus pumilus</i> (KJ476724.1)               | 100% | Positive |
| AWest_I_3B  | <i>Pantoea sp. CH-N10</i> (HQ396801.1)             | 99%  | Negative |
| AWest_II_3  | <i>Pantoea sp. CH-N10</i> (HQ396801.1)             | 99%  | Negative |
| AWest_II_4* | <i>Bacillus pumilus</i> (KJ476724.1)               | 97%  | Positive |
| Upper_I_1A  | <i>Pseudomonas sp. UT1</i> (JX133179.1)            | 99%  | Negative |
| Upper_I_2A* | <i>Stenotrophomonas chelatiphaga</i> (NR_116366.1) | 99%  | Negative |
| Upper_I_3A* | <i>Pseudomonas oryzihabitans</i> (KJ401059.1)      | 100% | Negative |
| Upper_II_1A | <i>Pseudomonas oryzihabitans</i> (KJ401059.1)      | 100% | Negative |
| Upper_II_2A | <i>Pseudomonas oryzihabitans</i> (KJ401059.1)      | 99%  | Negative |
| Upper_II_3A | <i>Pseudomonas oryzihabitans</i> (KJ401059.1)      | 100% | Negative |

### Bacterial Communities Inhabiting Limestone Monuments

|              |                                                 |      |          |
|--------------|-------------------------------------------------|------|----------|
| Upper_II_4A  | <i>Exiguobacterium sibiricum</i> (LK391534.1)   | 99%  | Positive |
| Upper_I_1B*  | <i>Pseudomonas synxantha</i> (KC834326.1)       | 100% | Negative |
| Upper_I_2B   | <i>Pseudomonas putida</i> (KT767824.1)          | 98%  | Negative |
| Upper_I_3B   | <i>Pseudomonas synxantha</i> (KC834326.1)       | 100% | Negative |
| Upper_I_4B*  | <i>Pseudomonas synxantha</i> (NR_113583.1)      | 99%  | Negative |
| Upper_II_1B* | <i>Pseudomonas oryzihabitans</i> (KJ401059.1)   | 99%  | Negative |
| Upper_II_2B* | <i>Pseudomonas oryzihabitans</i> (KJ401059.1)   | 100% | Negative |
| Upper_II_3B  | <i>Pseudomonas synxantha</i> (KC834326.1)       | 100% | Negative |
| Upper_II_4B  | <i>Pseudomonas synxantha</i> (KC834326.1)       | 99%  | Negative |
| Lower_I_1A   | <i>Stenotrophomonas rhizophila</i> (KR055001.1) | 99%  | Negative |
| Lower_I_2A   | <i>Stenotrophomonas rhizophila</i> (KR055001.1) | 99%  | Negative |
| Lower_I_4A   | <i>Stenotrophomonas rhizophila</i> (KR055001.1) | 99%  | Negative |
| Lower_I_5A*  | <i>Bacillus altitudinis</i> (KJ826579.1)        | 99%  | Positive |
| Lower_II_1A  | <i>Stenotrophomonas rhizophila</i> (KR055001.1) | 100% | Negative |
| Lower_II_2A  | <i>Microbacterium oxydans</i> (LN890028.1)      | 100% | Positive |
| Lower_II_3A  | <i>Stenotrophomonas rhizophila</i> (KR055001.1) | 100% | Negative |
| Lower_II_4A  | <i>Stenotrophomonas rhizophila</i> (KR055001.1) | 99%  | Negative |
| Lower_I_1B   | <i>Pseudomonas rhizosphaerae</i> (KF147111.1)   | 99%  | Negative |
| Lower_II_2B  | <i>Stenotrophomonas rhizophila</i> (KR055001.1) | 99%  | Negative |
| Lower_II_4B* | <i>Pseudomonas graminis</i> (KF147075.1)        | 99%  | Negative |
| Lower_II_5B* | <i>Bacillus pumilus</i> (KJ476724.1)            | 99%  | Positive |

\* Bacterial strains showed to be carbonatogenic

Supplementary figures

Supplementary Figure S1

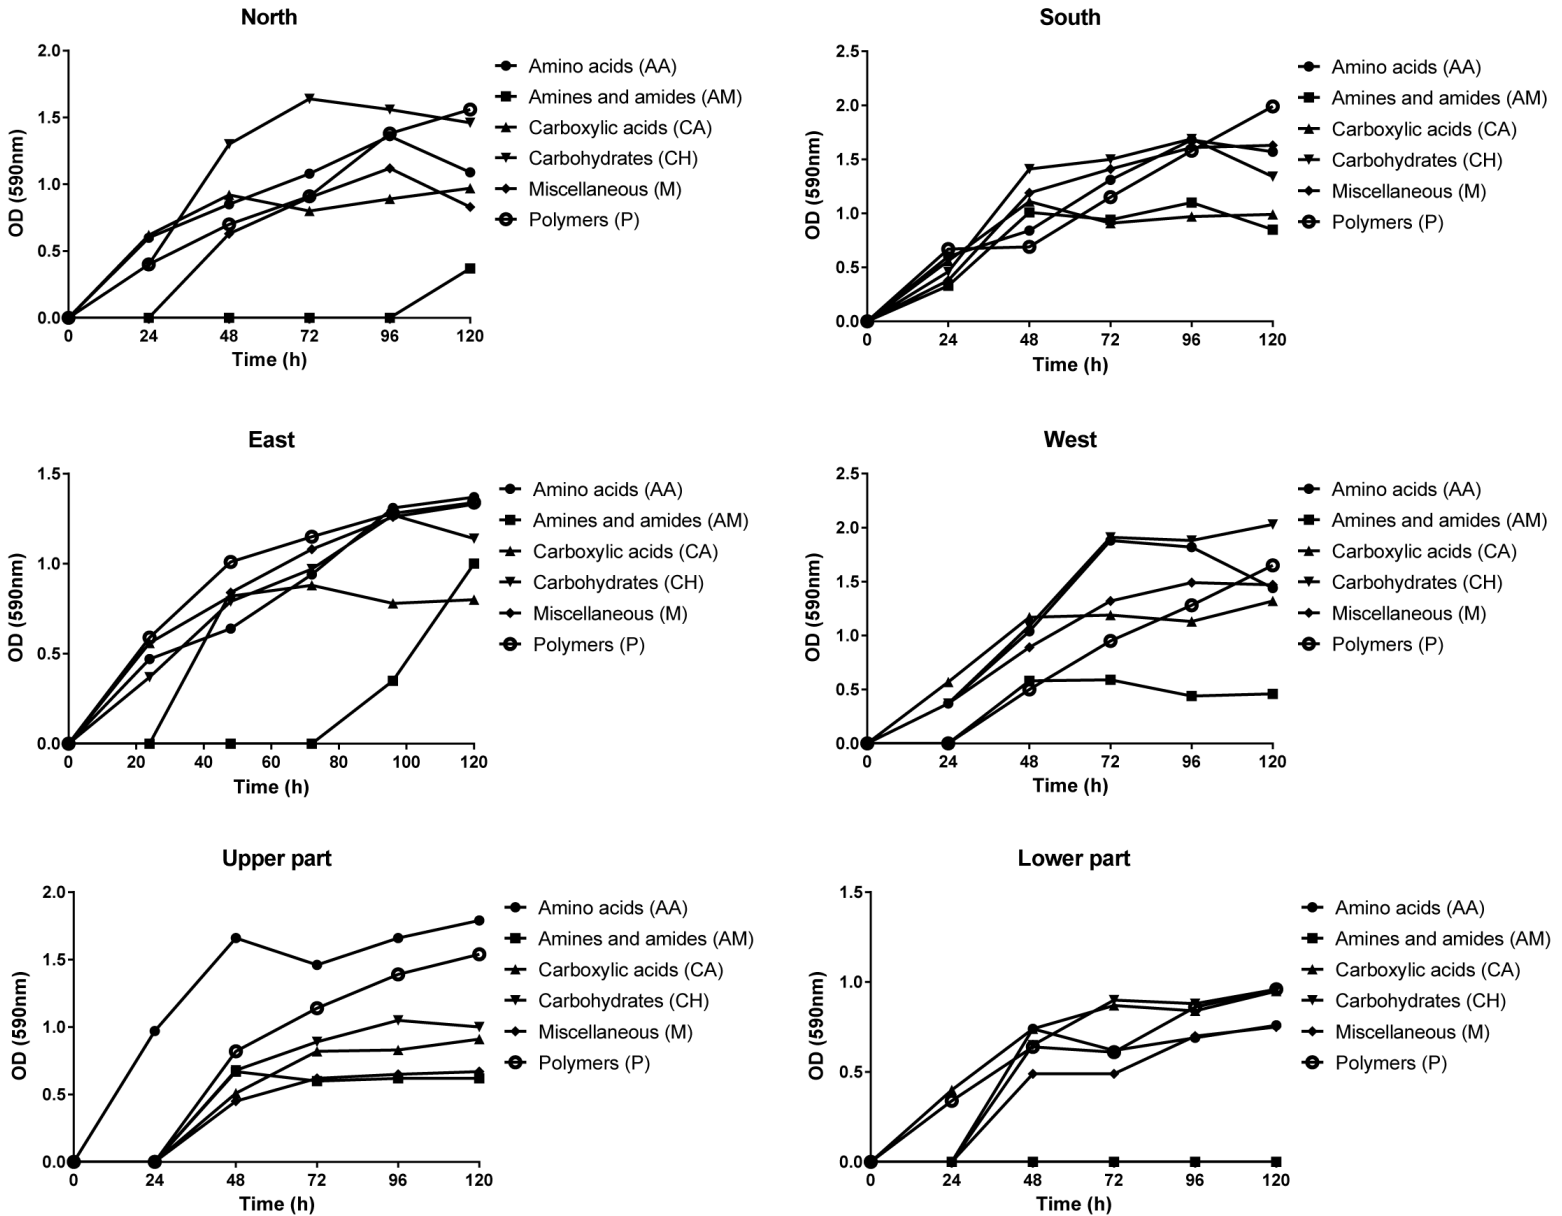

Time variation of the average well colour development in the BIOLOG EcoPates resulted from organic carbon substrate utilization by the microbial communities present on Saint Donatus statue.

Supplementary Figure S2

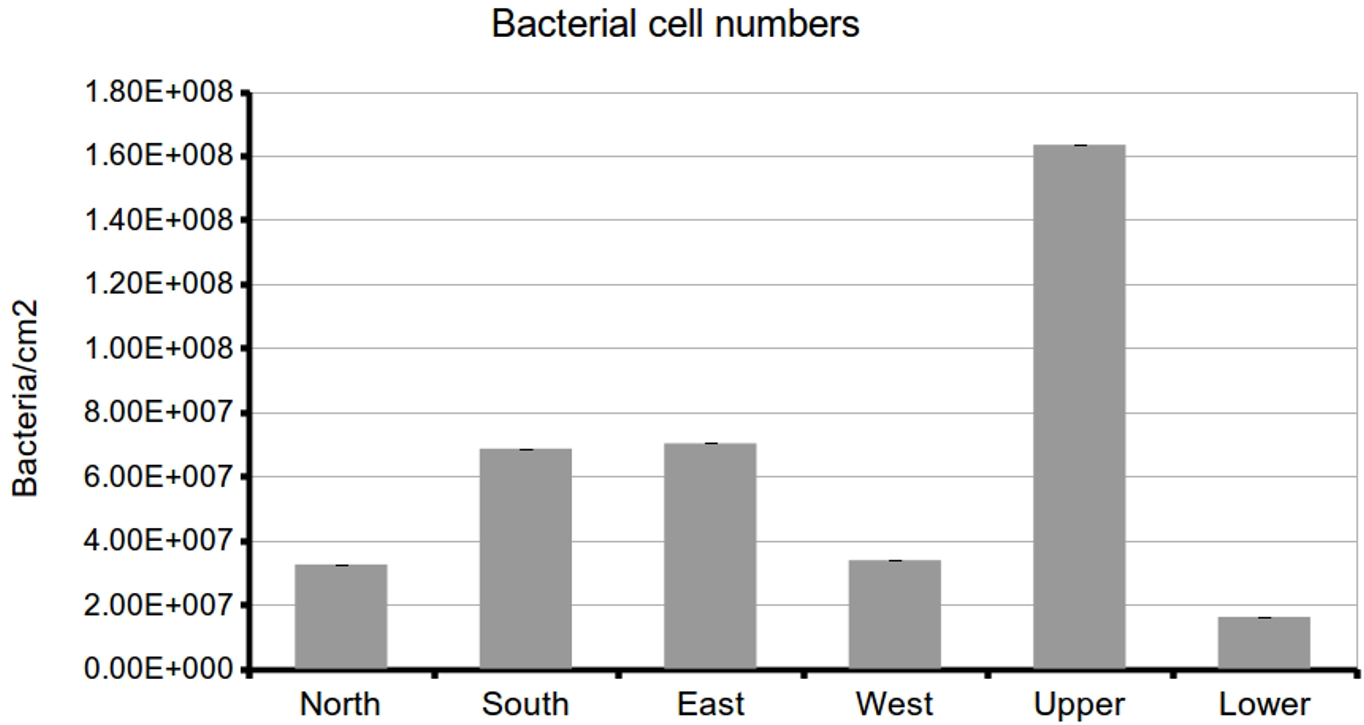

Bacterial cell numbers/cm<sup>2</sup> as estimated by quantitative real-time PCR. The sampling sites are represented on the abscissa. The columns represent means and the error bars (black colour) represent s.d. values.



Supplementary Figure S3

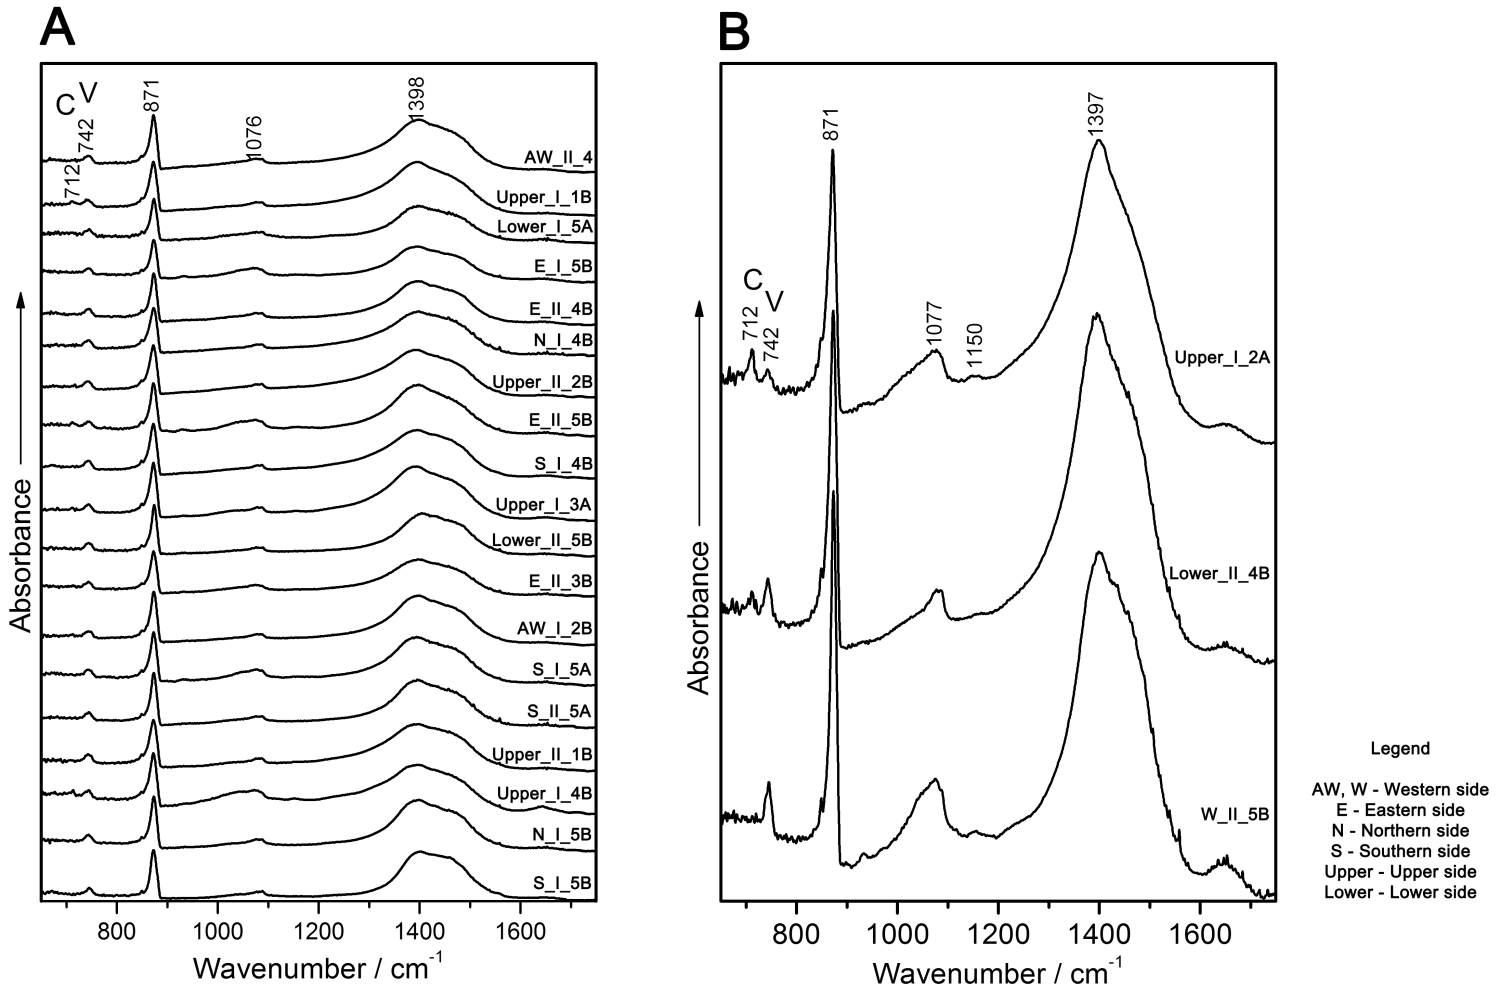

FTIR spectra of the crystals recovered from the M-3 agar media recorded on a conventional 4100 Jasco FTIR spectrometer using an ATR sampling device (ZnSe crystal, one reflection). The spectral resolution was 4  $\text{cm}^{-1}$  and the number of scans was 32. The samples in the A image were mostly vaterite (V), while the ones from the B image contained predominantly calcite (C).
